# Supplementary material
Source: publisher figshare collection journal article supplement (https://sage.figshare.com/ndownloader/files/34012668)
Supplement: Supplementary file 1 [file 34012668]

Online appendix

*Detailed demographic statistics*

| <i>Major occupational category</i>             | <i>Code</i> | <i>Employed responses</i> |              | <i>Unemployed responses</i> |              |
|------------------------------------------------|-------------|---------------------------|--------------|-----------------------------|--------------|
|                                                |             | <i>Men</i>                | <i>Women</i> | <i>Men</i>                  | <i>Women</i> |
| Management                                     | 11          | 16.7%                     | 15.5%        | 13.7%                       | 9.9%         |
| Business and Financial Operations              | 13          | 10.8%                     | 10.8%        | 7.7%                        | 5.9%         |
| Computer and Mathematical                      | 15          | 12.9%                     | 5.7%         | 7.1%                        | 2.3%         |
| Architecture and Engineering                   | 17          | 6.3%                      | 2.0%         | 6.6%                        | 2.8%         |
| Life, Physical, and Social Science             | 19          | 4.1%                      | 4.4%         | 7.5%                        | 8.3%         |
| Community and Social Service                   | 21          | 2.0%                      | 3.7%         | 1.5%                        | 4.0%         |
| Legal                                          | 23          | 4.0%                      | 3.5%         | 3.0%                        | 3.8%         |
| Education, Training, and Library               | 25          | 6.3%                      | 11.3%        | 5.7%                        | 7.9%         |
| Arts, Design, Entertainment, Sports, and Media | 27          | 6.7%                      | 8.9%         | 25.2%                       | 30.2%        |
| Healthcare Practitioners and Technical         | 29          | 4.2%                      | 6.9%         | 5.2%                        | 10.0%        |
| Healthcare Support                             | 31          | 0.3%                      | 1.6%         | 0.2%                        | 0.8%         |
| Protective Service                             | 33          | 2.0%                      | 0.5%         | 2.6%                        | 1.4%         |
| Food Preparation and Serving Related           | 35          | 1.9%                      | 2.1%         | 0.5%                        | 0.9%         |
| Building and Grounds Cleaning and Maintenance  | 37          | 0.5%                      | 0.3%         | 0.2%                        | 0.3%         |
| Personal Care and Service                      | 39          | 0.8%                      | 2.3%         | 1.6%                        | 3.2%         |
| Sales and Related                              | 41          | 8.9%                      | 7.3%         | 3.2%                        | 2.5%         |
| Office and Administrative Support              | 43          | 4.6%                      | 11.8%        | 1.5%                        | 3.2%         |
| Farming, Fishing, and Forestry                 | 45          | 0.1%                      | 0.1%         | 0.4%                        | 0.5%         |
| Construction and Extraction                    | 47          | 1.3%                      | 0.1%         | 0.7%                        | 0.1%         |
| Installation, Maintenance, and Repair          | 49          | 1.6%                      | 0.1%         | 1.1%                        | 0.2%         |
| Production                                     | 51          | 1.7%                      | 0.7%         | 1.3%                        | 1.4%         |
| Transportation and Material Moving             | 53          | 2.3%                      | 0.5%         | 3.6%                        | 0.6%         |

*Note* . Percentages are from 33,128 responses (men: 11,940; women: 21,188) from employed adults and 9503 responses (men: 3,166; women: 6,337) from unemployed adults. The code is the two-digit code from the Bureau of Labor Statistics Occupational Classification System.
